# Supplementary material for: Eco-friendly fabrication of vanadium nanoparticles via Fusarium solani with dual antifungal and anticancer bioactivities
Source: Royal Society of Chemistry journal article supplement (doi:10.1039/d5ra08636a), 2026-01-01
Supplement: d5ra08636a1.pdf [file d5ra08636a1.pdf]

## Supplementary

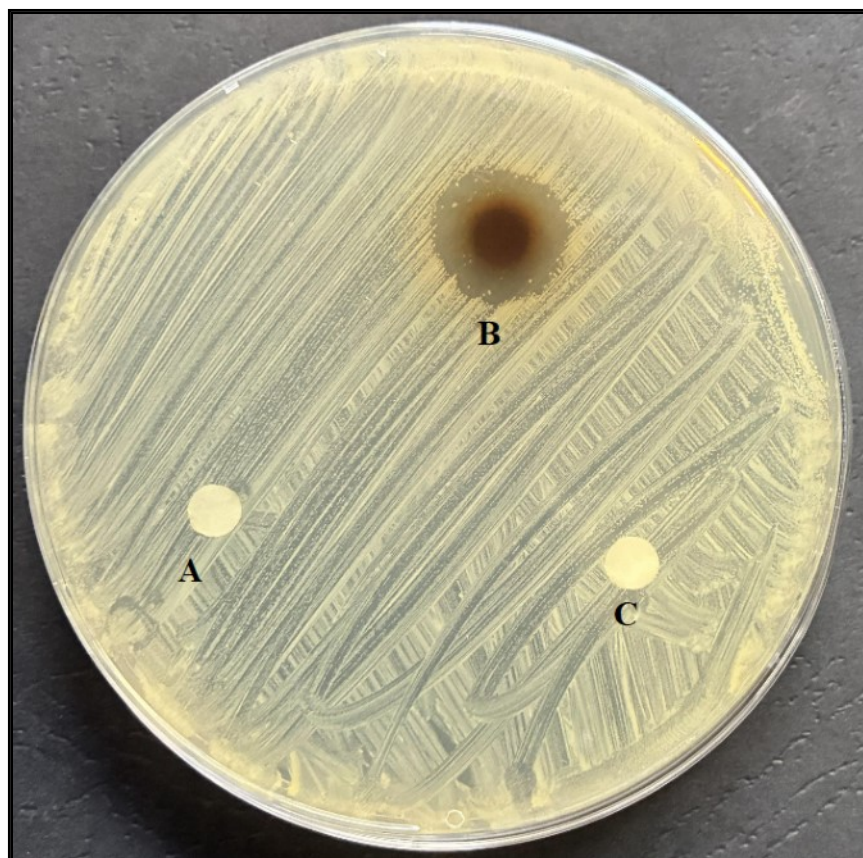

Fig. S1 initial antifungal screening for VNP against *C. albicans*. A) Fungal Extract showed no clear zone. B) VNP showed clear zone against *C. albicans*. C) ammonium metavanadate precursor without any zone of inhibition.

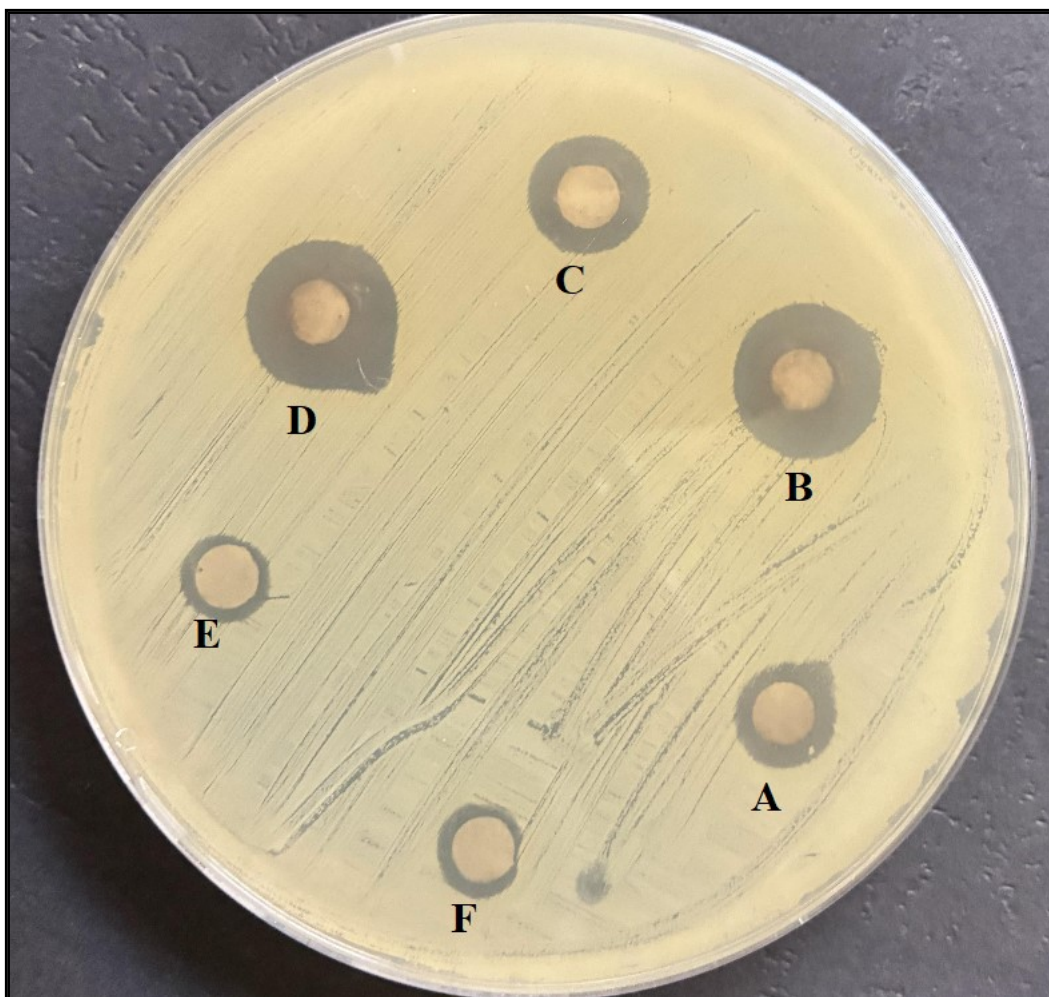

Fig. S2 optimization of VNP synthesis. Different pH and temperature for synthesis used. A) Temperature 25 °C, B) 30 °C. C) 35 °C. D) pH 7. E) pH 9. F) pH 5 used during synthesis. Temperature 30 °C and pH 7 showed most significant antifungal activity.

Table S1. EDS spectrum of biosynthesized V<sub>2</sub>O<sub>3</sub> nanoparticles showing the elemental composition. Peaks corresponding to vanadium (V), carbon (C) and oxygen (O) confirm the NP core composition and biogenic synthesis using fungal metabolites as strong capping agent. Minor signals (Na, Mg, P, S, Cl, and K) may originate from fungal growth medium also their presence support biosynthesis and without altering V-base phase. (Cu) likely from grid.

| Element | Apparent Concentration | k Ratio | Wt%    | Wt% Sigma | Atomic % |
|---------|------------------------|---------|--------|-----------|----------|
| C       | 1.63                   | 0.01629 | 33.34  | 0.66      | 48.95    |
| N       | 0.65                   | 0.00117 | 4.74   | 1.29      | 5.97     |
| O       | 1.93                   | 0.00651 | 29.48  | 0.69      | 32.49    |
| Na      | 0.24                   | 0.00103 | 1.55   | 0.08      | 1.19     |
| Mg      | 0.02                   | 0.00013 | 0.15   | 0.05      | 0.11     |
| P       | 0.10                   | 0.00054 | 0.42   | 0.08      | 0.24     |
| S       | 0.18                   | 0.00152 | 1.18   | 0.09      | 0.65     |
| Cl      | 0.11                   | 0.00092 | 0.71   | 0.06      | 0.35     |
| K       | 0.24                   | 0.00203 | 1.47   | 0.07      | 0.66     |
| Ca      | 0.11                   | 0.00102 | 0.71   | 0.07      | 0.31     |
| V       | 3.30                   | 0.03297 | 26.20  | 0.48      | 9.07     |
| Cu      | 0.00                   | 0.00004 | 0.07   | 0.17      | 0.02     |
| Total:  |                        |         | 100.00 |           | 100.00   |

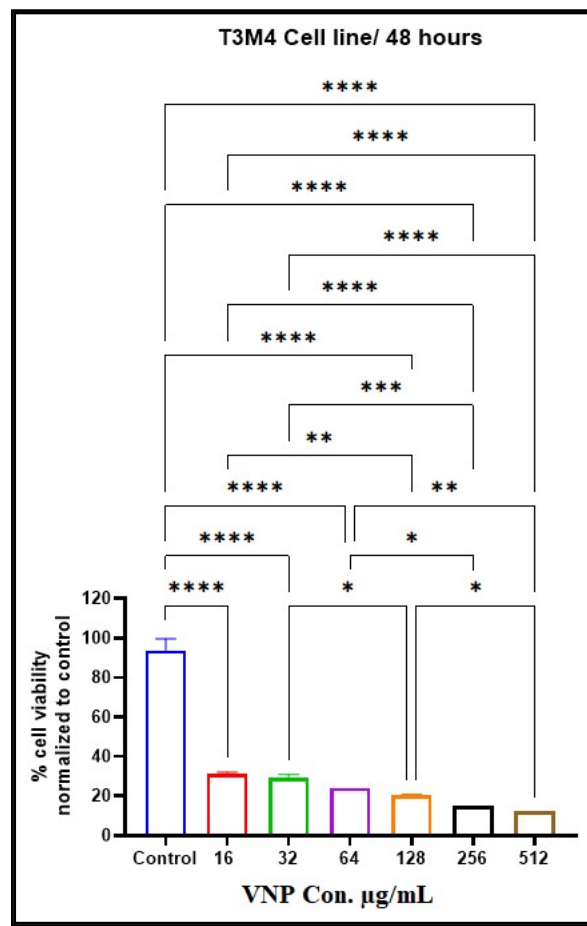

Fig. S3 Initial anticancer activity for VNP. High concentrations were used to determine the anticancer activity. All concentrations were showed significant anticancer activity. The doses were reduced to determine the IC50
